# Supplementary material for: Population Distribution, Settlement Patterns and Accessibility across Africa in 2010
Source: PLoS One. 2012 Feb 21;7(2):e31743. doi: 10.1371/journal.pone.0031743 (PMC3283664; doi:10.1371/journal.pone.0031743)
Supplement: Table S1 — Settlement patterns, population distribution and accessibility measures at the national level. (XLS) [file pone.0031743.s004.xls]

## Sheet: Sheet1
ISO	Country name	% land surface that contains 90% of the population	Aggregation index of settlements R[1]	Variance of R within country	ATT[2]	Skewness of ATT²
AGO	Angola	40.99	0.48	0.01	6.08	3.91
BDI	Burundi	70.09	0.7	0.06	3.82	1.61
BEN	Benin	49.31	0.76	0.01	2.28	3.15
BFA	Burkina Faso	66.52	0.75	0.03	2.85	2.09
BWA	Botswana	29.94	0.65	0.03	4.92	3.48
CAF	Central African Republic	40.66	0.6	0.02	5.46	2.23
CIV	Cote d'Ivoire	51.74	0.91	0.01	2.33	3.49
CMR	Cameroon	39.54	0.56	0.01	2.85	3.83
COD	DRC	48.54	0.72	0.01	5.27	2.76
COG	Congo	7.1	0.58	0.01	2.37	5.21
DJI	Djibouti	57.31	0.81	0.05	1.46	4.72
DZA	Algeria	5.29	0.37	0.07	2.02	4.73
EGY	Egypt	3.14	0.3	0.14	0.61	5.25
ERI	Eritrea	51.54	0.68	0.09	4.82	2.02
ESH	Western Sahara	49.38	0.31	0.01	6.98	4.62
ETH	Ethiopia	39.59	0.73	0.04	7.1	0.89
GAB	Gabon	32.04	0.56	0.01	6.08	5
GHA	Ghana	49.22	0.82	0.01	2.24	3.38
GIN	Guinea	27.66	0.95	0	1.33	4.66
GMB	Gambia	38.24	1	0	1.17	4.63
GNB	Guinea-Bissau	60.24	0.79	0.04	2.7	2.58
GNQ	Equatorial Guinea	74.68	0.74	0.03	3.69	1.82
KEN	Kenya	18.3	0.53	0.04	3.03	2.59
LBR	Liberia	54.04	0.71	0.04	2.9	3.08
LBY	Libya	1.57	0.34	0.04	1.8	5.18
LSO	Lesotho	46.04	0.68	0.07	8.55	2.24
MAR	Morocco	35.65	0.62	0.01	1.75	4.6
MDG	Madagascar	58.31	0.67	0.05	5.02	1.4
MLI	Mali	22.57	0.56	0.13	3.19	2.43
MOZ	Mozambique	47.23	0.71	0.01	5.26	3.33
MRT	Mauritania	21.7	0.33	0.08	6.22	2.99
MWI	Malawi	51.86	1.01	0.05	4.48	1.58
NAM	Namibia	7.37	0.25	0.08	8.25	1.6
NER	Niger	12.18	0.39	0.06	3.11	2.6
NGA	Nigeria	38.27	0.88	0.01	1.92	3.94
RWA	Rwanda	68.03	0.72	0.06	4.17	1.72
SDN	Sudan	35.18	0.63	0.03	3.59	3.86
SEN	Senegal	42.42	0.82	0.01	1.55	4.26
SLE	Sierra Leone	63.9	0.91	0.07	1.77	3.06
SOM	Somalia	27.13	0.72	0.02	5.16	2.93
SSD	South Sudan	53.89	0.75	0.01	6.93	1.01
SWZ	Swaziland	68.72	1.05	0	3.1	2.31
TCD	Chad	32.03	0.46	0.07	5.18	1.47
TGO	Togo	43.24	0.78	0.02	1.78	4.28
TUN	Tunisia	28.56	0.72	0.03	1.29	4.69
TZA	Tanzania	36.61	0.73	0.01	4.31	2.67
UGA	Uganda	46.59	0.49	0.05	2.77	2.23
ZAF	South Africa	18.33	0.57	0.02	2.22	4.58
ZMB	Zambia	63.97	0.62	0.01	6.74	3.9
ZWE	Zimbabwe	51.56	0.67	0.01	3.01	3.24
[1] Clark and Evans aggregation index calculated based on settlement point patterns. A low R value (< 1) suggests that settlements are spatially clustered, whereas a high R value (> 1) suggests that settlements are spatially ordered.
[2] Average travel time to settlements of more than 50,000 people (hours).
